# Supplementary material for: Inhibition of nucleolar stress response by Sirt1: A potential mechanism of acetylation‐independent regulation of p53 accumulation
Source: PubMed Central journal article supplement (PMC6413664; doi:10.1111/acel.12900), 2019-01-08
Supplement: ACEL-18-e12900-s002.pdf [file ACEL-18-e12900-s002.pdf]

## Supplemental Figure S2

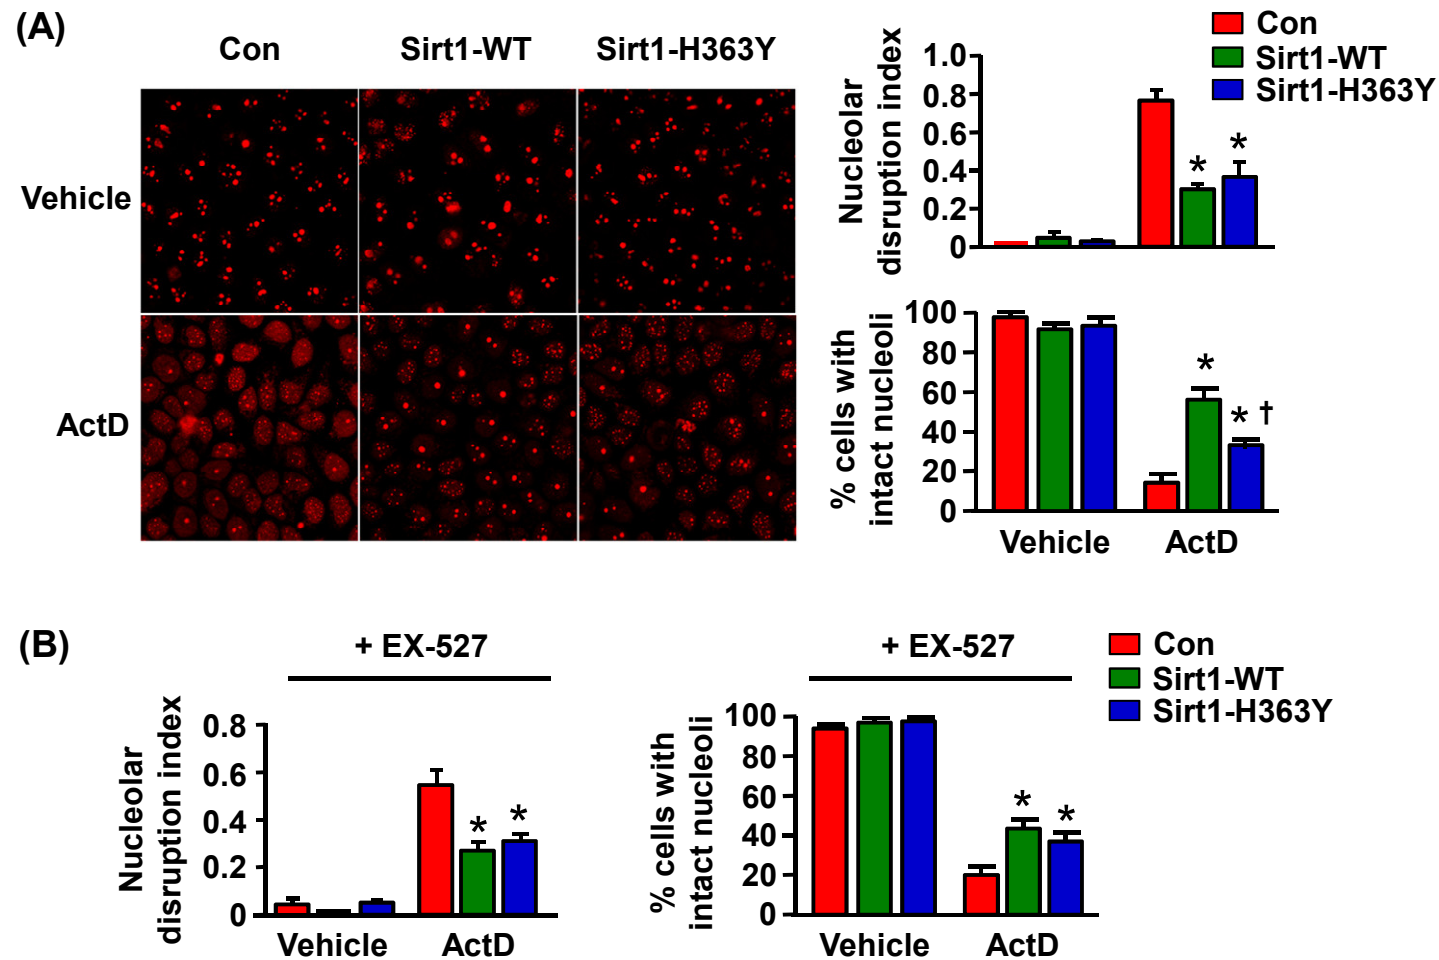

**Supplemental Figure S2.** Deacetylase activity-independent effect of Sirt1 on ActD-induced NSR. (A) Immunofluorescence images of NPM and quantitative data showing that overexpression of wild type (WT) and the enzymatically dead H363Y mutant of Sirt1 both repressed ActD (5 nM)-induced NSR. (B) The same experiments were repeated in cells pretreated with the Sirt1 inhibitor EX-527 (10 μM). Data are mean ± SEM. \*  $P < 0.05$  versus Con, †  $P < 0.05$  versus WT, one-way ANOVA,  $n = 5$ .
