# Supplementary material for: Inhibition of nucleolar stress response by Sirt1: A potential mechanism of acetylation‐independent regulation of p53 accumulation
Source: PubMed Central journal article supplement (PMC6413664; doi:10.1111/acel.12900), 2019-01-08
Supplement: ACEL-18-e12900-s003.pdf [file ACEL-18-e12900-s003.pdf]

**Supplemental Table S1. Sirt1 binding proteins detected by SILAC-based proteomic analysis**

## Mascot Distiller Quantitation Report

**Sample:** 20130313IPSILAC  
**Project file:** file:///D:/daoyuanli/SILAC/20130313IPSILAC.rov  
**Timestamp:** Friday, March 15, 2013 11:04:30  
**Raw file 1:** D:\daoyuanli\LTDQ-Orbitrap\20130313IPSILAC.raw  
**Instrument method 1:** D:\Chi Lianli\Li Daoyuan\2013\IP\_SILAC\IP SILAC.meth  
**Quantitation method:** SILAC R+4 (15N) LDY  
 1 component SILAC, 99%  
**Mascot search results:** [Open in new window](#)

| Hit | Member | Accession   | Score | Mass   | L/H          | SD (geo)     | #  | Description                                                                           |
|-----|--------|-------------|-------|--------|--------------|--------------|----|---------------------------------------------------------------------------------------|
| 1   | 1      | ROA2_HUMAN  | 2506  | 37407  | <b>1.319</b> | <b>1.089</b> | 12 | Heterogeneous nuclear ribonucleoproteins A2/B1 OS=Homo sapiens GN=HNRNPA2B1 PE=1 SV=2 |
| 1   | 2      | ROA1_HUMAN  | 1867  | 38823  | <b>1.781</b> | <b>1.035</b> | 12 | Heterogeneous nuclear ribonucleoprotein A1 OS=Homo sapiens GN=HNRNPA1 PE=1 SV=5       |
| 1   | 3      | ROA3_HUMAN  | 608   | 39686  | <b>1.618</b> | <b>1.027</b> | 4  | Heterogeneous nuclear ribonucleoprotein A3 OS=Homo sapiens GN=HNRNPA3 PE=1 SV=2       |
| 1   | 4      | ROA0_HUMAN  | 134   | 30886  |              |              |    | Heterogeneous nuclear ribonucleoprotein A0 OS=Homo sapiens GN=HNRNPA0 PE=1 SV=1       |
| 2   |        | DHX9_HUMAN  | 1511  | 140869 | <b>1.462</b> | <b>1.068</b> | 16 | ATP-dependent RNA helicase A OS=Homo sapiens GN=DHX9 PE=1 SV=4                        |
| 3   | 1      | K1C10_HUMAN | 1161  | 58792  | <b>95.60</b> | <b>3.630</b> | 20 | Keratin, type I cytoskeletal 10 OS=Homo sapiens GN=KRT10 PE=1 SV=6                    |
| 3   | 2      | K1C14_HUMAN | 188   | 51529  | <b>124.4</b> | <b>3.894</b> | 4  | Keratin, type I cytoskeletal 14 OS=Homo sapiens GN=KRT14 PE=1 SV=4                    |
| 3   | 3      | K1C16_HUMAN | 141   | 51236  | <b>99.44</b> | <b>3.249</b> | 5  | Keratin, type I cytoskeletal 16 OS=Homo sapiens GN=KRT16 PE=1 SV=4                    |
| 3   | 4      | K1C18_HUMAN | 55    | 48029  | 199.4        | 16.70        | 3  | Keratin, type I cytoskeletal 18 OS=Homo sapiens GN=KRT18 PE=1 SV=2                    |
| 4   |        | HNRPK_HUMAN | 1066  | 51088  | <b>1.532</b> | <b>1.075</b> | 9  | Heterogeneous nuclear ribonucleoprotein K OS=Homo sapiens GN=HNRNPK PE=1 SV=1         |
| 5   | 1      | PABP1_HUMAN | 915   | 70797  | <b>1.667</b> | <b>1.074</b> | 8  | Polyadenylate-binding protein 1 OS=Homo sapiens GN=PABPC1 PE=1 SV=2                   |
| 5   | 2      | PABP4_HUMAN | 491   | 70738  | <b>1.677</b> | <b>1.105</b> | 5  | Polyadenylate-binding protein 4 OS=Homo sapiens GN=PABPC4 PE=1 SV=1                   |
| 6   | 1      | K2C1_HUMAN  | 868   | 65999  | <b>226.6</b> | <b>4.826</b> | 13 | Keratin, type II cytoskeletal 1 OS=Homo sapiens GN=KRT1                               |

|    |   |             |     |        |              |              |           |                                                                                |
|----|---|-------------|-----|--------|--------------|--------------|-----------|--------------------------------------------------------------------------------|
|    |   |             |     |        |              |              |           | PE=1 SV=6                                                                      |
| 6  | 2 | K22E_HUMAN  | 433 | 65521  | <b>160.9</b> | <b>4.039</b> | <b>10</b> | Keratin, type II cytoskeletal 2 epidermal OS=Homo sapiens GN=KRT2 PE=1 SV=2    |
| 6  | 3 | K2C5_HUMAN  | 126 | 62488  | <b>155.1</b> | <b>3.702</b> | <b>6</b>  | Keratin, type II cytoskeletal 5 OS=Homo sapiens GN=KRT5 PE=1 SV=3              |
| 6  | 4 | K2C8_HUMAN  | 105 | 53799  | <b>247.1</b> | <b>4.483</b> | <b>3</b>  | Keratin, type II cytoskeletal 8 OS=Homo sapiens GN=KRT8 PE=1 SV=7              |
| 6  | 5 | K2C6A_HUMAN | 86  | 60152  | <b>247.1</b> | <b>4.105</b> | <b>5</b>  | Keratin, type II cytoskeletal 6A OS=Homo sapiens GN=KRT6A PE=1 SV=3            |
| 7  |   | HNRPU_HUMAN | 804 | 90707  | <b>1.479</b> | <b>1.114</b> | <b>8</b>  | Heterogeneous nuclear ribonucleoprotein U OS=Homo sapiens GN=HNRNPU PE=1 SV=6  |
| 8  |   | K1C9_HUMAN  | 748 | 62027  | 613.3        | 254.5        | 11        | Keratin, type I cytoskeletal 9 OS=Homo sapiens GN=KRT9 PE=1 SV=3               |
| 9  |   | SFPO_HUMAN  | 701 | 76341  | <b>1.569</b> | <b>1.120</b> | <b>12</b> | Splicing factor, proline- and glutamine-rich OS=Homo sapiens GN=SFPO PE=1 SV=2 |
| 10 | 1 | DDX5_HUMAN  | 694 | 69105  | <b>1.846</b> | <b>1.150</b> | <b>10</b> | Probable ATP-dependent RNA helicase DDX5 OS=Homo sapiens GN=DDX5 PE=1 SV=1     |
| 10 | 2 | DDX3X_HUMAN | 523 | 73417  | <b>1.754</b> | <b>1.057</b> | <b>5</b>  | ATP-dependent RNA helicase DDX3X OS=Homo sapiens GN=DDX3X PE=1 SV=3            |
| 10 | 3 | DDX17_HUMAN | 492 | 80457  | <b>1.754</b> | <b>1.193</b> | <b>3</b>  | Probable ATP-dependent RNA helicase DDX17 OS=Homo sapiens GN=DDX17 PE=1 SV=2   |
| 11 | 1 | SMRC2_HUMAN | 682 | 132980 |              |              |           | SWI/SNF complex subunit SMARCC2 OS=Homo sapiens GN=SMARCC2 PE=1 SV=1           |
| 11 | 2 | SMRC1_HUMAN | 568 | 122994 |              |              |           | SWI/SNF complex subunit SMARCC1 OS=Homo sapiens GN=SMARCC1 PE=1 SV=3           |
| 12 | 1 | ACTB_HUMAN  | 664 | 41710  | <b>1.416</b> | <b>1.046</b> | <b>8</b>  | Actin, cytoplasmic 1 OS=Homo sapiens GN=ACTB PE=1 SV=1                         |
| 12 | 2 | ACTC_HUMAN  | 299 | 41992  | <b>1.421</b> | <b>1.051</b> | <b>4</b>  | Actin, alpha cardiac muscle 1 OS=Homo sapiens GN=ACTC1 PE=1 SV=1               |
| 13 | 1 | HNRPR_HUMAN | 654 | 71095  | <b>1.421</b> | <b>1.015</b> | <b>3</b>  | Heterogeneous nuclear ribonucleoprotein R OS=Homo sapiens GN=HNRNPR PE=1 SV=1  |
| 13 | 2 | HNRPO_HUMAN | 329 | 69739  |              |              |           | Heterogeneous nuclear ribonucleoprotein Q OS=Homo sapiens GN=SYNCRIP PE=1 SV=2 |
| 14 | 1 | FUS_HUMAN   | 642 | 53541  | <b>1.956</b> | <b>1.099</b> | <b>5</b>  | RNA-binding protein FUS OS=Homo sapiens GN=FUS PE=1 SV=1                       |
| 14 | 2 | RBP56_HUMAN | 249 | 62016  |              |              |           | TATA-binding protein-associated factor 2N OS=Homo                              |

|    |   |             |     |        |              |              |           |                                                                                          |
|----|---|-------------|-----|--------|--------------|--------------|-----------|------------------------------------------------------------------------------------------|
|    |   |             |     |        |              |              |           | sapiens GN=TAF15 PE=1 SV=1                                                               |
| 15 |   | HNRH3_HUMAN | 629 | 37015  | <b>1.721</b> | <b>1.067</b> | <b>4</b>  | Heterogeneous nuclear ribonucleoprotein H3 OS=Homo sapiens GN=HNRNPH3 PE=1 SV=2          |
| 16 |   | TFG_HUMAN   | 609 | 43485  | <b>1.708</b> | <b>1.085</b> | <b>11</b> | Protein TFG OS=Homo sapiens GN=TFG PE=1 SV=2                                             |
| 17 |   | HNRPC_HUMAN | 589 | 33721  |              |              |           | Heterogeneous nuclear ribonucleoproteins C1/C2 OS=Homo sapiens GN=HNRNPC PE=1 SV=4       |
| 18 |   | DDX1_HUMAN  | 585 | 82380  | <b>1.450</b> | <b>1.037</b> | <b>2</b>  | ATP-dependent RNA helicase DDX1 OS=Homo sapiens GN=DDX1 PE=1 SV=2                        |
| 19 |   | HNRPL_HUMAN | 530 | 64092  | <b>1.699</b> | <b>1.017</b> | <b>2</b>  | Heterogeneous nuclear ribonucleoprotein L OS=Homo sapiens GN=HNRNPL PE=1 SV=2            |
| 20 | 1 | HNRH1_HUMAN | 525 | 49322  | <b>1.660</b> | <b>1.074</b> | <b>5</b>  | Heterogeneous nuclear ribonucleoprotein H OS=Homo sapiens GN=HNRNPH1 PE=1 SV=4           |
| 20 | 2 | HNRPF_HUMAN | 368 | 45739  | 1.617        | 1.136        | 2         | Heterogeneous nuclear ribonucleoprotein F OS=Homo sapiens GN=HNRNPF PE=1 SV=3            |
| 20 | 3 | HNRH2_HUMAN | 360 | 49356  | <b>1.660</b> | <b>1.083</b> | <b>3</b>  | Heterogeneous nuclear ribonucleoprotein H2 OS=Homo sapiens GN=HNRNPH2 PE=1 SV=1          |
| 21 |   | ILF3_HUMAN  | 508 | 95279  | 1.510        | 1.081        | 2         | Interleukin enhancer-binding factor 3 OS=Homo sapiens GN=ILF3 PE=1 SV=3                  |
| 22 |   | FA98A_HUMAN | 490 | 55494  | <b>1.447</b> | <b>1.069</b> | <b>3</b>  | Protein FAM98A OS=Homo sapiens GN=FAM98A PE=1 SV=1                                       |
| 23 |   | TBA1B_HUMAN | 483 | 50203  |              |              |           | Tubulin alpha-1B chain OS=Homo sapiens GN=TUBA1B PE=1 SV=1                               |
| 24 | 1 | TBB5_HUMAN  | 477 | 49727  | <b>1.605</b> | <b>1.052</b> | <b>2</b>  | Tubulin beta chain OS=Homo sapiens GN=TUBB PE=1 SV=2                                     |
| 24 | 2 | TBB4B_HUMAN | 420 | 49887  |              |              |           | Tubulin beta-4B chain OS=Homo sapiens GN=TUBB4B PE=1 SV=1                                |
| 25 |   | SAHH_HUMAN  | 393 | 47753  |              |              |           | Adenosylhomocysteinase OS=Homo sapiens GN=AHCY PE=1 SV=4                                 |
| 26 |   | CCAR1_HUMAN | 392 | 133066 |              |              |           | Cell division cycle and apoptosis regulator protein 1 OS=Homo sapiens GN=CCAR1 PE=1 SV=2 |
| 27 |   | RTCB_HUMAN  | 387 | 55175  | 1.174        | 1.090        | 2         | tRNA-splicing ligase RtcB homolog OS=Homo sapiens GN=C22orf28 PE=1 SV=1                  |
| 28 |   | EF1D_HUMAN  | 386 | 31167  | 146.4        | 478.1        | 2         | Elongation factor 1-delta OS=Homo sapiens GN=EEF1D PE=1 SV=5                             |

|    |   |             |     |        |              |              |          |                                                                                                         |
|----|---|-------------|-----|--------|--------------|--------------|----------|---------------------------------------------------------------------------------------------------------|
| 29 | 1 | EF1A2_HUMAN | 384 | 50510  | <b>1.568</b> | <b>1.123</b> | <b>3</b> | Elongation factor 1-alpha 2<br>OS=Homo sapiens GN=EEF1A2<br>PE=1 SV=1                                   |
| 29 | 2 | EF1A1_HUMAN | 340 | 50177  | 1.676        | 1.059        | 2        | Elongation factor 1-alpha 1<br>OS=Homo sapiens GN=EEF1A1<br>PE=1 SV=1                                   |
| 30 |   | MVP_HUMAN   | 371 | 99266  | 3.490        | 8.993        | 3        | Major vault protein OS=Homo<br>sapiens GN=MVP PE=1 SV=4                                                 |
| 31 |   | HNRL1_HUMAN | 370 | 95943  | <b>2.004</b> | <b>1.133</b> | <b>5</b> | Heterogeneous nuclear<br>ribonucleoprotein U-like protein<br>1 OS=Homo sapiens<br>GN=HNRNPUL1 PE=1 SV=2 |
| 32 | 1 | G3BP1_HUMAN | 367 | 52280  |              |              |          | Ras GTPase-activating protein-<br>binding protein 1 OS=Homo<br>sapiens GN=G3BP1 PE=1<br>SV=1            |
| 32 | 2 | G3BP2_HUMAN | 105 | 54088  |              |              |          | Ras GTPase-activating protein-<br>binding protein 2 OS=Homo<br>sapiens GN=G3BP2 PE=1<br>SV=2            |
| 33 |   | EF1G_HUMAN  | 365 | 50175  | <b>1.520</b> | <b>1.045</b> | <b>5</b> | Elongation factor 1-gamma<br>OS=Homo sapiens GN=EEF1G<br>PE=1 SV=3                                      |
| 34 |   | CH60_HUMAN  | 358 | 61104  |              |              |          | 60 kDa heat shock protein,<br>mitochondrial OS=Homo<br>sapiens GN=HSPD1 PE=1<br>SV=2                    |
| 35 |   | ARI1A_HUMAN | 352 | 242239 |              |              |          | AT-rich interactive domain-<br>containing protein 1A<br>OS=Homo sapiens GN=ARID1A<br>PE=1 SV=3          |
| 36 |   | ILF2_HUMAN  | 350 | 43127  | <b>1.418</b> | <b>1.015</b> | <b>2</b> | Interleukin enhancer-binding<br>factor 2 OS=Homo sapiens<br>GN=ILF2 PE=1 SV=2                           |
| 37 |   | NONO_HUMAN  | 342 | 54381  | <b>1.645</b> | <b>1.107</b> | <b>5</b> | Non-POU domain-containing<br>octamer-binding protein<br>OS=Homo sapiens GN=NONO<br>PE=1 SV=4            |
| 38 |   | CAPR1_HUMAN | 331 | 78454  |              |              |          | Caprin-1 OS=Homo sapiens<br>GN=CAPRIN1 PE=1 SV=2                                                        |
| 39 |   | HNRPM_HUMAN | 329 | 77680  | 0.6530       | 2198         | 2        | Heterogeneous nuclear<br>ribonucleoprotein M OS=Homo<br>sapiens GN=HNRNPM PE=1<br>SV=3                  |
| 40 | 1 | H2B1C_HUMAN | 320 | 13898  | <b>1.454</b> | <b>1.086</b> | <b>3</b> | Histone H2B type 1-C/E/F/G/I<br>OS=Homo sapiens<br>GN=HIST1H2BC PE=1 SV=4                               |
| 40 | 2 | H2B1B_HUMAN | 310 | 13942  | <b>1.454</b> | <b>1.086</b> | <b>3</b> | Histone H2B type 1-B<br>OS=Homo sapiens<br>GN=HIST1H2BB PE=1 SV=2                                       |
| 41 |   | CN166_HUMAN | 313 | 28115  | <b>1.509</b> | <b>1.134</b> | <b>3</b> | UPF0568 protein C14orf166<br>OS=Homo sapiens<br>GN=C14orf166 PE=1 SV=1                                  |
| 42 |   | TERA_HUMAN  | 298 | 89266  |              |              |          | Transitional endoplasmic<br>reticulum ATPase OS=Homo<br>sapiens GN=VCP PE=1 SV=4                        |
| 43 |   | FLNA_HUMAN  | 290 | 280935 |              |              |          | Filamin-A OS=Homo sapiens<br>GN=FLNA PE=1 SV=4                                                          |

|    |   |             |     |        |              |              |          |                                                                                     |
|----|---|-------------|-----|--------|--------------|--------------|----------|-------------------------------------------------------------------------------------|
| 44 | 1 | HSP7C_HUMAN | 285 | 70854  |              |              |          | Heat shock cognate 71 kDa protein OS=Homo sapiens GN=HSPA8 PE=1 SV=1                |
| 44 | 2 | GRP78_HUMAN | 241 | 72400  |              |              |          | 78 kDa glucose-regulated protein OS=Homo sapiens GN=HSPA5 PE=1 SV=2                 |
| 44 | 3 | HSP71_HUMAN | 137 | 70009  |              |              |          | Heat shock 70 kDa protein 1A/1B OS=Homo sapiens GN=HSPA1A PE=1 SV=5                 |
| 45 | 1 | H2A2A_HUMAN | 284 | 14087  | <b>1.407</b> | <b>1.121</b> | <b>5</b> | Histone H2A type 2-A OS=Homo sapiens GN=HIST2H2AA3 PE=1 SV=3                        |
| 45 | 2 | H2A1B_HUMAN | 265 | 14127  | <b>1.407</b> | <b>1.115</b> | <b>5</b> | Histone H2A type 1-B/E OS=Homo sapiens GN=HIST1H2AB PE=1 SV=2                       |
| 45 | 3 | H2AV_HUMAN  | 84  | 13501  | <b>1.372</b> | <b>1.079</b> | <b>3</b> | Histone H2A.V OS=Homo sapiens GN=H2AFV PE=1 SV=3                                    |
| 46 |   | RS2_HUMAN   | 278 | 31400  |              |              |          | 40S ribosomal protein S2 OS=Homo sapiens GN=RPS2 PE=1 SV=2                          |
| 47 | 1 | AGO2_HUMAN  | 243 | 97373  |              |              |          | Protein argonaute-2 OS=Homo sapiens GN=EIF2C2 PE=1 SV=3                             |
| 47 | 2 | AGO3_HUMAN  | 50  | 97545  |              |              |          | Protein argonaute-3 OS=Homo sapiens GN=EIF2C3 PE=1 SV=2                             |
| 48 |   | RS15_HUMAN  | 236 | 17089  |              |              |          | 40S ribosomal protein S15 OS=Homo sapiens GN=RPS15 PE=1 SV=2                        |
| 49 | 1 | SMCA4_HUMAN | 232 | 184530 |              |              |          | Transcription activator BRG1 OS=Homo sapiens GN=SMARCA4 PE=1 SV=2                   |
| 49 | 2 | SMCA2_HUMAN | 190 | 181166 |              |              |          | Probable global transcription activator SNF2L2 OS=Homo sapiens GN=SMARCA2 PE=1 SV=2 |
| 50 |   | RU17_HUMAN  | 231 | 51526  | <b>1.583</b> | <b>1.117</b> | <b>4</b> | U1 small nuclear ribonucleoprotein 70 kDa OS=Homo sapiens GN=SNRNP70 PE=1 SV=2      |
| 51 |   | SNRPA_HUMAN | 225 | 31311  |              |              |          | U1 small nuclear ribonucleoprotein A OS=Homo sapiens GN=SNRPA PE=1 SV=3             |
| 52 |   | MYH9_HUMAN  | 218 | 226882 |              |              |          | Myosin-9 OS=Homo sapiens GN=MYH9 PE=1 SV=4                                          |
| 53 |   | SMD1_HUMAN  | 217 | 13337  | 1.678        | 1.089        | 2        | Small nuclear ribonucleoprotein Sm D1 OS=Homo sapiens GN=SNRPD1 PE=1 SV=1           |
| 54 | 1 | YBOX1_HUMAN | 216 | 36058  |              |              |          | Nuclease-sensitive element-binding protein 1 OS=Homo sapiens GN=YBX1 PE=1 SV=3      |
| 54 | 2 | DBPA_HUMAN  | 150 | 40230  |              |              |          | DNA-binding protein A OS=Homo sapiens GN=CSDA PE=1 SV=4                             |
|    |   |             |     |        |              |              |          | 60S ribosomal protein L6                                                            |

|    |   |             |     |        |              |              |          |                                                                                             |
|----|---|-------------|-----|--------|--------------|--------------|----------|---------------------------------------------------------------------------------------------|
| 55 |   | RL6_HUMAN   | 216 | 32795  |              |              |          | OS=Homo sapiens GN=RPL6<br>PE=1 SV=3                                                        |
| 56 |   | SMD2_HUMAN  | 213 | 13546  | 1.627        | 1.112        | 2        | Small nuclear ribonucleoprotein<br>Sm D2 OS=Homo sapiens<br>GN=SNRPD2 PE=1 SV=1             |
| 57 | 1 | HNRDL_HUMAN | 209 | 46541  | 1.610        | 1.090        | 2        | Heterogeneous nuclear<br>ribonucleoprotein D-like<br>OS=Homo sapiens GN=HNRPDL<br>PE=1 SV=3 |
| 57 | 2 | HNRPD_HUMAN | 204 | 38466  |              |              |          | Heterogeneous nuclear<br>ribonucleoprotein D0 OS=Homo<br>sapiens GN=HNRNPD PE=1<br>SV=1     |
| 57 | 3 | ROAA_HUMAN  | 203 | 36262  |              |              |          | Heterogeneous nuclear<br>ribonucleoprotein A/B<br>OS=Homo sapiens<br>GN=HNRNPAB PE=1 SV=2   |
| 58 |   | MATR3_HUMAN | 201 | 94565  |              |              |          | Matrin-3 OS=Homo sapiens<br>GN=MATR3 PE=1 SV=2                                              |
| 59 |   | RL9_HUMAN   | 199 | 21914  |              |              |          | 60S ribosomal protein L9<br>OS=Homo sapiens GN=RPL9<br>PE=1 SV=1                            |
| 60 |   | CLH1_HUMAN  | 199 | 191820 |              |              |          | Clathrin heavy chain 1<br>OS=Homo sapiens GN=CLTC<br>PE=1 SV=5                              |
| 61 |   | EF1B_HUMAN  | 191 | 24768  |              |              |          | Elongation factor 1-beta<br>OS=Homo sapiens GN=EEF1B2<br>PE=1 SV=3                          |
| 62 |   | RS7_HUMAN   | 191 | 22169  |              |              |          | 40S ribosomal protein S7<br>OS=Homo sapiens GN=RPS7<br>PE=1 SV=1                            |
| 63 |   | PTBP1_HUMAN | 189 | 57257  |              |              |          | Polypyrimidine tract-binding<br>protein 1 OS=Homo sapiens<br>GN=PTBP1 PE=1 SV=1             |
| 64 |   | THOC4_HUMAN | 186 | 26872  |              |              |          | THO complex subunit 4<br>OS=Homo sapiens GN=ALYREF<br>PE=1 SV=3                             |
| 65 |   | H4_HUMAN    | 181 | 11360  | <b>1.370</b> | <b>1.126</b> | <b>4</b> | Histone H4 OS=Homo sapiens<br>GN=HIST1H4A PE=1 SV=2                                         |
| 66 |   | EWS_HUMAN   | 180 | 68615  |              |              |          | RNA-binding protein EWS<br>OS=Homo sapiens GN=EWSR1<br>PE=1 SV=1                            |
| 67 |   | ELAV1_HUMAN | 180 | 36149  | 1.790        | 1.163        | 2        | ELAV-like protein 1 OS=Homo<br>sapiens GN=ELAVL1 PE=1<br>SV=2                               |
| 68 |   | SAFB1_HUMAN | 173 | 102580 |              |              |          | Scaffold attachment factor B1<br>OS=Homo sapiens GN=SAFB<br>PE=1 SV=4                       |
| 69 |   | RS3A_HUMAN  | 170 | 29982  |              |              |          | 40S ribosomal protein S3a<br>OS=Homo sapiens GN=RPS3A<br>PE=1 SV=2                          |
| 70 | 1 | SRSF1_HUMAN | 162 | 27728  | 1.380        | 39.37        | 3        | Serine/arginine-rich splicing<br>factor 1 OS=Homo sapiens<br>GN=SRSF1 PE=1 SV=2             |
| 70 | 2 | SRSF9_HUMAN | 40  | 25526  |              |              |          | Serine/arginine-rich splicing<br>factor 9 OS=Homo sapiens<br>GN=SRSF9 PE=1 SV=1             |

|    |  |             |     |        |       |       |   |                                                                                                                                                    |
|----|--|-------------|-----|--------|-------|-------|---|----------------------------------------------------------------------------------------------------------------------------------------------------|
| 71 |  | RL7_HUMAN   | 154 | 29315  |       |       |   | 60S ribosomal protein L7<br>OS=Homo sapiens GN=RPL7<br>PE=1 SV=1                                                                                   |
| 72 |  | SC23A_HUMAN | 153 | 86277  |       |       |   | Protein transport protein<br>Sec23A OS=Homo sapiens<br>GN=SEC23A PE=1 SV=2                                                                         |
| 73 |  | RL12_HUMAN  | 150 | 17847  |       |       |   | 60S ribosomal protein L12<br>OS=Homo sapiens GN=RPL12<br>PE=1 SV=1                                                                                 |
| 74 |  | NPM_HUMAN   | 149 | 32587  |       |       |   | Nucleophosmin OS=Homo<br>sapiens GN=NPM1 PE=1 SV=2                                                                                                 |
| 75 |  | RS8_HUMAN   | 147 | 24282  |       |       |   | 40S ribosomal protein S8<br>OS=Homo sapiens GN=RPS8<br>PE=1 SV=2                                                                                   |
| 76 |  | CBX1_HUMAN  | 145 | 21432  |       |       |   | Chromobox protein homolog 1<br>OS=Homo sapiens GN=CBX1<br>PE=1 SV=1                                                                                |
| 77 |  | U520_HUMAN  | 142 | 244843 |       |       |   | U5 small nuclear<br>ribonucleoprotein 200 kDa<br>helicase OS=Homo sapiens<br>GN=SNRNP200 PE=1 SV=2                                                 |
| 78 |  | RL3_HUMAN   | 142 | 46199  |       |       |   | 60S ribosomal protein L3<br>OS=Homo sapiens GN=RPL3<br>PE=1 SV=2                                                                                   |
| 79 |  | DDX6_HUMAN  | 141 | 54482  |       |       |   | Probable ATP-dependent RNA<br>helicase DDX6 OS=Homo<br>sapiens GN=DDX6 PE=1 SV=2                                                                   |
| 80 |  | RS14_HUMAN  | 140 | 16263  |       |       |   | 40S ribosomal protein S14<br>OS=Homo sapiens GN=RPS14<br>PE=1 SV=3                                                                                 |
| 81 |  | ADT2_HUMAN  | 140 | 32899  |       |       |   | ADP/ATP translocase 2<br>OS=Homo sapiens<br>GN=SLC25A5 PE=1 SV=7                                                                                   |
| 82 |  | LARP1_HUMAN | 138 | 123434 |       |       |   | La-related protein 1 OS=Homo<br>sapiens GN=LARP1 PE=1<br>SV=2                                                                                      |
| 83 |  | ATX2L_HUMAN | 135 | 113499 |       |       |   | Ataxin-2-like protein OS=Homo<br>sapiens GN=ATXN2L PE=1<br>SV=2                                                                                    |
| 84 |  | RL7A_HUMAN  | 133 | 30069  |       |       |   | 60S ribosomal protein L7a<br>OS=Homo sapiens GN=RPL7A<br>PE=1 SV=2                                                                                 |
| 85 |  | RL18A_HUMAN | 132 | 20749  |       |       |   | 60S ribosomal protein L18a<br>OS=Homo sapiens GN=RPL18A<br>PE=1 SV=2                                                                               |
| 86 |  | RS16_HUMAN  | 131 | 16435  |       |       |   | 40S ribosomal protein S16<br>OS=Homo sapiens GN=RPS16<br>PE=1 SV=2                                                                                 |
| 87 |  | SNF5_HUMAN  | 130 | 44209  |       |       |   | SWI/SNF-related matrix-<br>associated actin-dependent<br>regulator of chromatin<br>subfamily B member 1<br>OS=Homo sapiens<br>GN=SMARCB1 PE=1 SV=2 |
| 88 |  | RUXG_HUMAN  | 128 | 8506   | 1.563 | 111.5 | 3 | Small nuclear ribonucleoprotein<br>G OS=Homo sapiens<br>GN=SNRPG PE=1 SV=1                                                                         |



|     |   |             |     |        |              |              |          |                                                                                                                                    |
|-----|---|-------------|-----|--------|--------------|--------------|----------|------------------------------------------------------------------------------------------------------------------------------------|
| 89  |   | PRP8_HUMAN  | 126 | 274021 |              |              |          | Pre-mRNA-processing-splicing factor 8 OS=Homo sapiens GN=PRPF8 PE=1 SV=2                                                           |
| 90  |   | RUXE_HUMAN  | 125 | 10825  |              |              |          | Small nuclear ribonucleoprotein E OS=Homo sapiens GN=SNRPE PE=1 SV=1                                                               |
| 91  | 1 | SMRD1_HUMAN | 124 | 58196  |              |              |          | SWI/SNF-related matrix-associated actin-dependent regulator of chromatin subfamily D member 1 OS=Homo sapiens GN=SMARCD1 PE=1 SV=2 |
| 91  | 2 | SMRD2_HUMAN | 114 | 58884  |              |              |          | SWI/SNF-related matrix-associated actin-dependent regulator of chromatin subfamily D member 2 OS=Homo sapiens GN=SMARCD2 PE=1 SV=3 |
| 92  |   | RS4X_HUMAN  | 123 | 29579  |              |              |          | 40S ribosomal protein S4, X isoform OS=Homo sapiens GN=RPS4X PE=1 SV=2                                                             |
| 93  |   | RLA2_HUMAN  | 121 | 11666  |              |              |          | 60S acidic ribosomal protein P2 OS=Homo sapiens GN=RPLP2 PE=1 SV=1                                                                 |
| 94  |   | RU1C_HUMAN  | 121 | 17417  |              |              |          | U1 small nuclear ribonucleoprotein C OS=Homo sapiens GN=SNRPC PE=1 SV=1                                                            |
| 95  |   | RL13_HUMAN  | 118 | 24247  | 1.854        | 1.090        | 2        | 60S ribosomal protein L13 OS=Homo sapiens GN=RPL13 PE=1 SV=4                                                                       |
| 96  |   | RBM14_HUMAN | 118 | 69612  |              |              |          | RNA-binding protein 14 OS=Homo sapiens GN=RBM14 PE=1 SV=2                                                                          |
| 97  |   | RL19_HUMAN  | 118 | 23451  | <b>1.736</b> | <b>1.017</b> | <b>2</b> | 60S ribosomal protein L19 OS=Homo sapiens GN=RPL19 PE=1 SV=1                                                                       |
| 98  |   | ACTN4_HUMAN | 117 | 104992 |              |              |          | Alpha-actinin-4 OS=Homo sapiens GN=ACTN4 PE=1 SV=2                                                                                 |
| 99  |   | RBMX_HUMAN  | 111 | 42534  |              |              |          | RNA-binding motif protein, X chromosome OS=Homo sapiens GN=RBMX PE=1 SV=3                                                          |
| 100 |   | RLA0_HUMAN  | 111 | 34304  |              |              |          | 60S acidic ribosomal protein P0 OS=Homo sapiens GN=RPLP0 PE=1 SV=1                                                                 |
| 101 |   | F120A_HUMAN | 111 | 122070 |              |              |          | Constitutive coactivator of PPAR-gamma-like protein 1 OS=Homo sapiens GN=FAM120A PE=1 SV=2                                         |
| 102 |   | RS6_HUMAN   | 109 | 28663  |              |              |          | 40S ribosomal protein S6 OS=Homo sapiens GN=RPS6 PE=1 SV=1                                                                         |
| 103 | 1 | TRA2B_HUMAN | 107 | 33901  |              |              |          | Transformer-2 protein homolog beta OS=Homo sapiens GN=TRA2B PE=1 SV=1                                                              |
| 103 | 2 | TRA2A_HUMAN | 73  | 32908  |              |              |          | Transformer-2 protein homolog alpha OS=Homo sapiens                                                                                |

|     |   |             |     |        |              |              |          |                                                                                                 |
|-----|---|-------------|-----|--------|--------------|--------------|----------|-------------------------------------------------------------------------------------------------|
|     |   |             |     |        |              |              |          | GN=TRA2A PE=1 SV=1                                                                              |
| 104 | 1 | H32_HUMAN   | 107 | 15450  |              |              |          | Histone H3.2 OS=Homo sapiens GN=HIST2H3A PE=1 SV=3                                              |
| 104 | 2 | H31_HUMAN   | 59  | 15466  |              |              |          | Histone H3.1 OS=Homo sapiens GN=HIST1H3A PE=1 SV=2                                              |
| 104 | 3 | H33_HUMAN   | 27  | 15390  |              |              |          | Histone H3.3 OS=Homo sapiens GN=H3F3A PE=1 SV=2                                                 |
| 105 |   | RSMB_HUMAN  | 106 | 24673  | <b>1.567</b> | <b>1.090</b> | <b>4</b> | Small nuclear ribonucleoprotein-associated proteins B and B' OS=Homo sapiens GN=SNRPB PE=1 SV=2 |
| 106 | 1 | SRSF7_HUMAN | 106 | 27350  |              |              |          | Serine/arginine-rich splicing factor 7 OS=Homo sapiens GN=SRSF7 PE=1 SV=1                       |
| 106 | 2 | SRSF3_HUMAN | 93  | 19477  |              |              |          | Serine/arginine-rich splicing factor 3 OS=Homo sapiens GN=SRSF3 PE=1 SV=1                       |
| 107 |   | RALY_HUMAN  | 106 | 32527  |              |              |          | RNA-binding protein Raly OS=Homo sapiens GN=RALY PE=1 SV=1                                      |
| 108 |   | RL22_HUMAN  | 105 | 14802  | 1.712        | 1.093        | 2        | 60S ribosomal protein L22 OS=Homo sapiens GN=RPL22 PE=1 SV=2                                    |
| 109 |   | RL23A_HUMAN | 104 | 17728  |              |              |          | 60S ribosomal protein L23a OS=Homo sapiens GN=RPL23A PE=1 SV=1                                  |
| 110 |   | ACL6A_HUMAN | 104 | 47506  |              |              |          | Actin-like protein 6A OS=Homo sapiens GN=ACTL6A PE=1 SV=1                                       |
| 111 |   | RL15_HUMAN  | 104 | 24131  |              |              |          | 60S ribosomal protein L15 OS=Homo sapiens GN=RPL15 PE=1 SV=2                                    |
| 112 |   | RS19_HUMAN  | 100 | 16098  |              |              |          | 40S ribosomal protein S19 OS=Homo sapiens GN=RPS19 PE=1 SV=2                                    |
| 113 | 1 | HS90B_HUMAN | 98  | 83212  |              |              |          | Heat shock protein HSP 90-beta OS=Homo sapiens GN=HSP90AB1 PE=1 SV=4                            |
| 113 | 2 | HS902_HUMAN | 63  | 39368  |              |              |          | Putative heat shock protein HSP 90-alpha A2 OS=Homo sapiens GN=HSP90AA2 PE=1 SV=2               |
| 114 |   | HNRL2_HUMAN | 97  | 85291  |              |              |          | Heterogeneous nuclear ribonucleoprotein U-like protein 2 OS=Homo sapiens GN=HNRNPUL2 PE=1 SV=1  |
| 115 |   | SMD3_HUMAN  | 97  | 13955  |              |              |          | Small nuclear ribonucleoprotein Sm D3 OS=Homo sapiens GN=SNRPD3 PE=1 SV=1                       |
| 116 |   | SF3B1_HUMAN | 95  | 146053 |              |              |          | Splicing factor 3B subunit 1 OS=Homo sapiens GN=SF3B1 PE=1 SV=3                                 |
| 117 |   | RL17_HUMAN  | 95  | 21443  |              |              |          | 60S ribosomal protein L17 OS=Homo sapiens GN=RPL17                                              |

|     |   |             |    |        |  |  |                                                                                                                                                    |
|-----|---|-------------|----|--------|--|--|----------------------------------------------------------------------------------------------------------------------------------------------------|
|     |   |             |    |        |  |  | PE=1 SV=3                                                                                                                                          |
| 118 |   | RL8_HUMAN   | 94 | 28007  |  |  | 60S ribosomal protein L8<br>OS=Homo sapiens GN=RPL8<br>PE=1 SV=2                                                                                   |
| 119 | 1 | IF2B1_HUMAN | 93 | 63557  |  |  | Insulin-like growth factor 2<br>mRNA-binding protein 1<br>OS=Homo sapiens<br>GN=IGF2BP1 PE=1 SV=2                                                  |
| 119 | 2 | IF2B3_HUMAN | 39 | 63769  |  |  | Insulin-like growth factor 2<br>mRNA-binding protein 3<br>OS=Homo sapiens<br>GN=IGF2BP3 PE=1 SV=2                                                  |
| 120 |   | RO52_HUMAN  | 93 | 54255  |  |  | E3 ubiquitin-protein ligase<br>TRIM21 OS=Homo sapiens<br>GN=TRIM21 PE=1 SV=1                                                                       |
| 121 |   | SMCE1_HUMAN | 93 | 46716  |  |  | SWI/SNF-related matrix-<br>associated actin-dependent<br>regulator of chromatin<br>subfamily E member 1<br>OS=Homo sapiens<br>GN=SMARCE1 PE=1 SV=2 |
| 122 |   | RS25_HUMAN  | 92 | 13758  |  |  | 40S ribosomal protein S25<br>OS=Homo sapiens GN=RPS25<br>PE=1 SV=1                                                                                 |
| 123 |   | RT29_HUMAN  | 92 | 45621  |  |  | 28S ribosomal protein S29,<br>mitochondrial OS=Homo<br>sapiens GN=DAP3 PE=1 SV=1                                                                   |
| 124 |   | RS3_HUMAN   | 91 | 26743  |  |  | 40S ribosomal protein S3<br>OS=Homo sapiens GN=RPS3<br>PE=1 SV=2                                                                                   |
| 125 |   | RS18_HUMAN  | 90 | 17708  |  |  | 40S ribosomal protein S18<br>OS=Homo sapiens GN=RPS18<br>PE=1 SV=3                                                                                 |
| 126 |   | RS23_HUMAN  | 90 | 15846  |  |  | 40S ribosomal protein S23<br>OS=Homo sapiens GN=RPS23<br>PE=1 SV=3                                                                                 |
| 127 |   | SF3B2_HUMAN | 89 | 100364 |  |  | Splicing factor 3B subunit 2<br>OS=Homo sapiens GN=SF3B2<br>PE=1 SV=2                                                                              |
| 128 |   | CC124_HUMAN | 89 | 25820  |  |  | Coiled-coil domain-containing<br>protein 124 OS=Homo sapiens<br>GN=CCDC124 PE=1 SV=1                                                               |
| 129 |   | NUFP2_HUMAN | 88 | 76139  |  |  | Nuclear fragile X mental<br>retardation-interacting protein<br>2 OS=Homo sapiens<br>GN=NUFIP2 PE=1 SV=1                                            |
| 130 |   | RS5_HUMAN   | 86 | 22930  |  |  | 40S ribosomal protein S5<br>OS=Homo sapiens GN=RPS5<br>PE=1 SV=4                                                                                   |
| 131 |   | RS24_HUMAN  | 85 | 15465  |  |  | 40S ribosomal protein S24<br>OS=Homo sapiens GN=RPS24<br>PE=1 SV=1                                                                                 |
| 132 |   | NUCL_HUMAN  | 84 | 76568  |  |  | Nucleolin OS=Homo sapiens<br>GN=NCL PE=1 SV=3                                                                                                      |
| 133 |   | RL30_HUMAN  | 83 | 12776  |  |  | 60S ribosomal protein L30<br>OS=Homo sapiens GN=RPL30<br>PE=1 SV=2                                                                                 |

|     |             |    |        |  |  |                                                                                                                                |
|-----|-------------|----|--------|--|--|--------------------------------------------------------------------------------------------------------------------------------|
| 134 | RL4_HUMAN   | 81 | 47831  |  |  | 60S ribosomal protein L4<br>OS=Homo sapiens GN=RPL4<br>PE=1 SV=5                                                               |
| 135 | RS17L_HUMAN | 80 | 15592  |  |  | 40S ribosomal protein S17-like<br>OS=Homo sapiens GN=RPS17L<br>PE=3 SV=1                                                       |
| 136 | WIPI3_HUMAN | 80 | 38141  |  |  | WD repeat domain<br>phosphoinositide-interacting<br>protein 3 OS=Homo sapiens<br>GN=WDR45L PE=2 SV=2                           |
| 137 | RS20_HUMAN  | 80 | 13364  |  |  | 40S ribosomal protein S20<br>OS=Homo sapiens GN=RPS20<br>PE=1 SV=1                                                             |
| 138 | DHX15_HUMAN | 79 | 90875  |  |  | Putative pre-mRNA-splicing<br>factor ATP-dependent RNA<br>helicase DHX15 OS=Homo<br>sapiens GN=DHX15 PE=1<br>SV=2              |
| 139 | SSXT_HUMAN  | 77 | 45935  |  |  | Protein SSXT OS=Homo<br>sapiens GN=SS18 PE=1 SV=3                                                                              |
| 140 | BCL7C_HUMAN | 77 | 23454  |  |  | B-cell CLL/lymphoma 7 protein<br>family member C OS=Homo<br>sapiens GN=BCL7C PE=1<br>SV=3                                      |
| 141 | RL14_HUMAN  | 76 | 23417  |  |  | 60S ribosomal protein L14<br>OS=Homo sapiens GN=RPL14<br>PE=1 SV=4                                                             |
| 142 | RS9_HUMAN   | 76 | 22578  |  |  | 40S ribosomal protein S9<br>OS=Homo sapiens GN=RPS9<br>PE=1 SV=3                                                               |
| 143 | KHDR1_HUMAN | 75 | 48333  |  |  | KH domain-containing, RNA-<br>binding, signal transduction-<br>associated protein 1 OS=Homo<br>sapiens GN=KHDRBS1 PE=1<br>SV=1 |
| 144 | MYO1C_HUMAN | 73 | 121965 |  |  | Unconventional myosin-Ic<br>OS=Homo sapiens GN=MYO1C<br>PE=1 SV=4                                                              |
| 145 | SR140_HUMAN | 72 | 118538 |  |  | U2 snRNP-associated SURP<br>motif-containing protein<br>OS=Homo sapiens GN=U2SURP<br>PE=1 SV=2                                 |
| 146 | RL23_HUMAN  | 71 | 14900  |  |  | 60S ribosomal protein L23<br>OS=Homo sapiens GN=RPL23<br>PE=1 SV=1                                                             |
| 147 | RL10A_HUMAN | 71 | 24859  |  |  | 60S ribosomal protein L10a<br>OS=Homo sapiens GN=RPL10A<br>PE=1 SV=2                                                           |
| 148 | NCBP1_HUMAN | 69 | 91952  |  |  | Nuclear cap-binding protein<br>subunit 1 OS=Homo sapiens<br>GN=NCBP1 PE=1 SV=1                                                 |
| 149 | RL32_HUMAN  | 68 | 15850  |  |  | 60S ribosomal protein L32<br>OS=Homo sapiens GN=RPL32<br>PE=1 SV=2                                                             |
| 150 | PM14_HUMAN  | 68 | 14611  |  |  | Pre-mRNA branch site protein<br>p14 OS=Homo sapiens<br>GN=SF3B14 PE=1 SV=1                                                     |
|     |             |    |        |  |  | 60S ribosomal protein L31                                                                                                      |

|     |             |    |        |              |              |          |                                                                                                                 |
|-----|-------------|----|--------|--------------|--------------|----------|-----------------------------------------------------------------------------------------------------------------|
| 151 | RL31_HUMAN  | 67 | 14454  |              |              |          | OS=Homo sapiens GN=RPL31<br>PE=1 SV=1                                                                           |
| 152 | EIF3F_HUMAN | 66 | 37588  |              |              |          | Eukaryotic translation initiation<br>factor 3 subunit F OS=Homo<br>sapiens GN=EIF3F PE=1 SV=1                   |
| 153 | RT27_HUMAN  | 65 | 47653  |              |              |          | 28S ribosomal protein S27,<br>mitochondrial OS=Homo<br>sapiens GN=MRPS27 PE=1<br>SV=3                           |
| 154 | PRKDC_HUMAN | 64 | 469645 |              |              |          | DNA-dependent protein kinase<br>catalytic subunit OS=Homo<br>sapiens GN=PRKDC PE=1<br>SV=3                      |
| 155 | RS15A_HUMAN | 63 | 14874  |              |              |          | 40S ribosomal protein S15a<br>OS=Homo sapiens GN=RPS15A<br>PE=1 SV=2                                            |
| 156 | THIO_HUMAN  | 62 | 11730  |              |              |          | Thioredoxin OS=Homo sapiens<br>GN=TXN PE=1 SV=3                                                                 |
| 157 | IGHG1_HUMAN | 61 | 36083  | <b>984.5</b> | <b>45.72</b> | <b>4</b> | Ig gamma-1 chain C region<br>OS=Homo sapiens GN=IGHG1<br>PE=1 SV=1                                              |
| 158 | DHX36_HUMAN | 61 | 114947 |              |              |          | Probable ATP-dependent RNA<br>helicase DHX36 OS=Homo<br>sapiens GN=DHX36 PE=1<br>SV=2                           |
| 159 | CPSM_HUMAN  | 59 | 165062 |              |              |          | Carbamoyl-phosphate synthase<br>[ammonia], mitochondrial<br>OS=Homo sapiens GN=CPS1<br>PE=1 SV=2                |
| 160 | TIA1_HUMAN  | 59 | 42936  |              |              |          | Nucleolysin TIA-1 isoform p40<br>OS=Homo sapiens GN=TIA1<br>PE=1 SV=3                                           |
| 161 | 1433T_HUMAN | 58 | 27791  |              |              |          | 14-3-3 protein theta OS=Homo<br>sapiens GN=YWHAQ PE=1<br>SV=1                                                   |
| 162 | RSBNL_HUMAN | 58 | 94990  |              |              |          | Round spermatid basic protein<br>1-like protein OS=Homo<br>sapiens GN=RSBN1L PE=1<br>SV=2                       |
| 163 | KBTB3_HUMAN | 58 | 69422  |              |              |          | Kelch repeat and BTB domain-<br>containing protein 3 OS=Homo<br>sapiens GN=KBTBD3 PE=2<br>SV=2                  |
| 164 | RL29_HUMAN  | 58 | 17801  |              |              |          | 60S ribosomal protein L29<br>OS=Homo sapiens GN=RPL29<br>PE=1 SV=2                                              |
| 165 | E2AK2_HUMAN | 57 | 62159  |              |              |          | Interferon-induced, double-<br>stranded RNA-activated protein<br>kinase OS=Homo sapiens<br>GN=EIF2AK2 PE=1 SV=2 |
| 166 | RL27A_HUMAN | 56 | 16551  |              |              |          | 60S ribosomal protein L27a<br>OS=Homo sapiens GN=RPL27A<br>PE=1 SV=2                                            |
| 167 | RS13_HUMAN  | 56 | 17268  |              |              |          | 40S ribosomal protein S13<br>OS=Homo sapiens GN=RPS13<br>PE=1 SV=2                                              |
|     |             |    |        |              |              |          | ATPase family AAA domain-<br>containing protein 3C                                                              |

|     |  |             |    |        |  |  |                                                                                                                  |
|-----|--|-------------|----|--------|--|--|------------------------------------------------------------------------------------------------------------------|
| 168 |  | ATD3C_HUMAN | 55 | 46350  |  |  | OS=Homo sapiens GN=ATAD3C<br>PE=1 SV=2                                                                           |
| 169 |  | RL18_HUMAN  | 55 | 21741  |  |  | 60S ribosomal protein L18<br>OS=Homo sapiens GN=RPL18<br>PE=1 SV=2                                               |
| 170 |  | RLA1_HUMAN  | 54 | 11507  |  |  | 60S acidic ribosomal protein P1<br>OS=Homo sapiens GN=RPLP1<br>PE=1 SV=1                                         |
| 171 |  | PGBM_HUMAN  | 54 | 468532 |  |  | Basement membrane-specific<br>heparan sulfate proteoglycan<br>core protein OS=Homo sapiens<br>GN=HSPG2 PE=1 SV=4 |
| 172 |  | PTCD3_HUMAN | 53 | 78651  |  |  | Pentatricopeptide repeat-<br>containing protein 3,<br>mitochondrial OS=Homo<br>sapiens GN=PTCD3 PE=1<br>SV=3     |
| 173 |  | DDX21_HUMAN | 52 | 87290  |  |  | Nucleolar RNA helicase 2<br>OS=Homo sapiens GN=DDX21<br>PE=1 SV=5                                                |
| 174 |  | GRP75_HUMAN | 52 | 73778  |  |  | Stress-70 protein,<br>mitochondrial OS=Homo<br>sapiens GN=HSPA9 PE=1<br>SV=2                                     |
| 175 |  | RBM3_HUMAN  | 51 | 17160  |  |  | Putative RNA-binding protein 3<br>OS=Homo sapiens GN=RBM3<br>PE=1 SV=1                                           |
| 176 |  | IF4G1_HUMAN | 51 | 175382 |  |  | Eukaryotic translation initiation<br>factor 4 gamma 1 OS=Homo<br>sapiens GN=EIF4G1 PE=1<br>SV=4                  |
| 177 |  | H13_HUMAN   | 51 | 22352  |  |  | Histone H1.3 OS=Homo<br>sapiens GN=HIST1H1D PE=1<br>SV=2                                                         |
| 178 |  | RT09_HUMAN  | 50 | 45806  |  |  | 28S ribosomal protein S9,<br>mitochondrial OS=Homo<br>sapiens GN=MRPS9 PE=1<br>SV=2                              |
| 179 |  | RT35_HUMAN  | 50 | 36897  |  |  | 28S ribosomal protein S35,<br>mitochondrial OS=Homo<br>sapiens GN=MRPS35 PE=1<br>SV=1                            |
| 180 |  | RL24_HUMAN  | 48 | 17836  |  |  | 60S ribosomal protein L24<br>OS=Homo sapiens GN=RPL24<br>PE=1 SV=1                                               |
| 181 |  | RL27_HUMAN  | 47 | 15840  |  |  | 60S ribosomal protein L27<br>OS=Homo sapiens GN=RPL27<br>PE=1 SV=2                                               |
| 182 |  | RM12_HUMAN  | 47 | 21375  |  |  | 39S ribosomal protein L12,<br>mitochondrial OS=Homo<br>sapiens GN=MRPL12 PE=1<br>SV=2                            |
| 183 |  | ARF1_HUMAN  | 46 | 20684  |  |  | ADP-ribosylation factor 1<br>OS=Homo sapiens GN=ARF1<br>PE=1 SV=2                                                |
| 184 |  | H15_HUMAN   | 46 | 22578  |  |  | Histone H1.5 OS=Homo<br>sapiens GN=HIST1H1B PE=1<br>SV=3                                                         |

|     |  |             |    |        |  |  |                                                                                                |
|-----|--|-------------|----|--------|--|--|------------------------------------------------------------------------------------------------|
| 185 |  | SRS10_HUMAN | 46 | 31282  |  |  | Serine/arginine-rich splicing factor 10 OS=Homo sapiens GN=SRSF10 PE=1 SV=1                    |
| 186 |  | VIME_HUMAN  | 45 | 53791  |  |  | Vimentin OS=Homo sapiens GN=VIM PE=1 SV=4                                                      |
| 187 |  | SF3B4_HUMAN | 45 | 44425  |  |  | Splicing factor 3B subunit 4 OS=Homo sapiens GN=SF3B4 PE=1 SV=1                                |
| 188 |  | ZFR_HUMAN   | 44 | 117162 |  |  | Zinc finger RNA-binding protein OS=Homo sapiens GN=ZFR PE=1 SV=2                               |
| 189 |  | MYL6_HUMAN  | 44 | 16939  |  |  | Myosin light polypeptide 6 OS=Homo sapiens GN=MYL6 PE=1 SV=2                                   |
| 190 |  | RM44_HUMAN  | 43 | 37603  |  |  | 39S ribosomal protein L44, mitochondrial OS=Homo sapiens GN=MRPL44 PE=1 SV=1                   |
| 191 |  | U5S1_HUMAN  | 43 | 109530 |  |  | 116 kDa U5 small nuclear ribonucleoprotein component OS=Homo sapiens GN=EFTUD2 PE=1 SV=1       |
| 192 |  | DEOC_HUMAN  | 41 | 35208  |  |  | Putative deoxyribose-phosphate aldolase OS=Homo sapiens GN=DERA PE=1 SV=2                      |
| 193 |  | DESP_HUMAN  | 41 | 332410 |  |  | Desmoplakin OS=Homo sapiens GN=DSP PE=1 SV=3                                                   |
| 194 |  | ATPA_HUMAN  | 41 | 59865  |  |  | ATP synthase subunit alpha, mitochondrial OS=Homo sapiens GN=ATP5A1 PE=1 SV=1                  |
| 195 |  | ODBB_HUMAN  | 40 | 43179  |  |  | 2-oxoisovalerate dehydrogenase subunit beta, mitochondrial OS=Homo sapiens GN=BCKDHB PE=1 SV=2 |
| 196 |  | RM49_HUMAN  | 40 | 19186  |  |  | 39S ribosomal protein L49, mitochondrial OS=Homo sapiens GN=MRPL49 PE=1 SV=1                   |
| 197 |  | PCBP1_HUMAN | 40 | 37538  |  |  | Poly(rC)-binding protein 1 OS=Homo sapiens GN=PCBP1 PE=1 SV=2                                  |
| 198 |  | RT28_HUMAN  | 39 | 20830  |  |  | 28S ribosomal protein S28, mitochondrial OS=Homo sapiens GN=MRPS28 PE=1 SV=1                   |
| 199 |  | RS11_HUMAN  | 38 | 18475  |  |  | 40S ribosomal protein S11 OS=Homo sapiens GN=RPS11 PE=1 SV=3                                   |
| 200 |  | RL5_HUMAN   | 37 | 34436  |  |  | 60S ribosomal protein L5 OS=Homo sapiens GN=RPL5 PE=1 SV=3                                     |
| 201 |  | RUXF_HUMAN  | 37 | 9731   |  |  | Small nuclear ribonucleoprotein F OS=Homo sapiens GN=SNRPF PE=1 SV=1                           |
| 202 |  | RS10_HUMAN  | 37 | 18958  |  |  | 40S ribosomal protein S10 OS=Homo sapiens GN=RPS10                                             |

|     |             |    |        |       |       |   |  |                                                                                                       |
|-----|-------------|----|--------|-------|-------|---|--|-------------------------------------------------------------------------------------------------------|
|     |             |    |        |       |       |   |  | PE=1 SV=1                                                                                             |
| 203 | SF3B5_HUMAN | 37 | 10145  |       |       |   |  | Splicing factor 3B subunit 5<br>OS=Homo sapiens GN=SF3B5<br>PE=1 SV=1                                 |
| 204 | DJC10_HUMAN | 37 | 91021  |       |       |   |  | DnaJ homolog subfamily C<br>member 10 OS=Homo sapiens<br>GN=DNAJC10 PE=1 SV=2                         |
| 205 | RENT1_HUMAN | 37 | 124267 |       |       |   |  | Regulator of nonsense<br>transcripts 1 OS=Homo sapiens<br>GN=UPF1 PE=1 SV=2                           |
| 206 | RBL1_HUMAN  | 36 | 121013 |       |       |   |  | Retinoblastoma-like protein 1<br>OS=Homo sapiens GN=RBL1<br>PE=1 SV=3                                 |
| 207 | PYR1_HUMAN  | 36 | 242829 |       |       |   |  | CAD protein OS=Homo sapiens<br>GN=CAD PE=1 SV=3                                                       |
| 208 | LSM12_HUMAN | 36 | 21715  |       |       |   |  | Protein LSM12 homolog<br>OS=Homo sapiens GN=LSM12<br>PE=1 SV=2                                        |
| 209 | ANXA2_HUMAN | 36 | 38664  |       |       |   |  | Annexin A2 OS=Homo sapiens<br>GN=ANXA2 PE=1 SV=2                                                      |
| 210 | RL21_HUMAN  | 35 | 18609  |       |       |   |  | 60S ribosomal protein L21<br>OS=Homo sapiens GN=RPL21<br>PE=1 SV=2                                    |
| 211 | RBMS1_HUMAN | 35 | 44517  |       |       |   |  | RNA-binding motif, single-<br>stranded-interacting protein 1<br>OS=Homo sapiens GN=RBMS1<br>PE=1 SV=3 |
| 212 | RAN_HUMAN   | 35 | 24444  |       |       |   |  | GTP-binding nuclear protein<br>Ran OS=Homo sapiens<br>GN=RAN PE=1 SV=3                                |
| 213 | FSIP2_HUMAN | 35 | 780119 | 1.323 | 1.037 | 2 |  | Fibrous sheath-interacting<br>protein 2 OS=Homo sapiens<br>GN=FSIP2 PE=1 SV=4                         |
| 214 | RT07_HUMAN  | 35 | 28196  |       |       |   |  | 28S ribosomal protein S7,<br>mitochondrial OS=Homo<br>sapiens GN=MRPS7 PE=1<br>SV=2                   |
| 215 | RL11_HUMAN  | 35 | 20307  |       |       |   |  | 60S ribosomal protein L11<br>OS=Homo sapiens GN=RPL11<br>PE=1 SV=2                                    |
| 216 | RL26_HUMAN  | 34 | 17248  |       |       |   |  | 60S ribosomal protein L26<br>OS=Homo sapiens GN=RPL26<br>PE=1 SV=1                                    |
| 217 | SPTN1_HUMAN | 34 | 284958 |       |       |   |  | Spectrin alpha chain, non-<br>erythrocytic 1 OS=Homo<br>sapiens GN=SPTAN1 PE=1<br>SV=3                |
| 218 | SC31A_HUMAN | 34 | 133091 |       |       |   |  | Protein transport protein<br>Sec31A OS=Homo sapiens<br>GN=SEC31A PE=1 SV=3                            |
| 219 | RSSA_HUMAN  | 33 | 32833  |       |       |   |  | 40S ribosomal protein SA<br>OS=Homo sapiens GN=RPSA<br>PE=1 SV=4                                      |
| 220 | G3P_HUMAN   | 32 | 36030  |       |       |   |  | Glyceraldehyde-3-phosphate<br>dehydrogenase OS=Homo<br>sapiens GN=GAPDH PE=1<br>SV=3                  |



|     |  |             |    |        |      |       |   |                                                                                                            |
|-----|--|-------------|----|--------|------|-------|---|------------------------------------------------------------------------------------------------------------|
| 221 |  | RS26L_HUMAN | 32 | 12994  |      |       |   | Putative 40S ribosomal protein S26-like 1 OS=Homo sapiens GN=RPS26P11 PE=5 SV=1                            |
| 222 |  | IF4A1_HUMAN | 31 | 46125  |      |       |   | Eukaryotic initiation factor 4A-1 OS=Homo sapiens GN=EIF4A1 PE=1 SV=1                                      |
| 223 |  | EBP2_HUMAN  | 31 | 34830  |      |       |   | Probable rRNA-processing protein EBP2 OS=Homo sapiens GN=EBNA1BP2 PE=1 SV=2                                |
| 224 |  | RT23_HUMAN  | 30 | 21825  |      |       |   | 28S ribosomal protein S23, mitochondrial OS=Homo sapiens GN=MRPS23 PE=1 SV=2                               |
| 225 |  | DSG1_HUMAN  | 30 | 113676 |      |       |   | Desmoglein-1 OS=Homo sapiens GN=DSG1 PE=1 SV=2                                                             |
| 226 |  | RL38_HUMAN  | 30 | 8233   |      |       |   | 60S ribosomal protein L38 OS=Homo sapiens GN=RPL38 PE=1 SV=2                                               |
| 227 |  | KV116_HUMAN | 29 | 11787  |      |       |   | Ig kappa chain V-I region Roy OS=Homo sapiens PE=1 SV=1                                                    |
| 228 |  | ERH_HUMAN   | 29 | 12251  |      |       |   | Enhancer of rudimentary homolog OS=Homo sapiens GN=ERH PE=1 SV=1                                           |
| 229 |  | PCBP2_HUMAN | 29 | 38611  |      |       |   | Poly(rC)-binding protein 2 OS=Homo sapiens GN=PCBP2 PE=1 SV=1                                              |
| 230 |  | RT02_HUMAN  | 29 | 33332  |      |       |   | 28S ribosomal protein S2, mitochondrial OS=Homo sapiens GN=MRPS2 PE=1 SV=1                                 |
| 231 |  | PECR_HUMAN  | 29 | 32560  |      |       |   | Peroxisomal trans-2-enoyl-CoA reductase OS=Homo sapiens GN=PECR PE=1 SV=2                                  |
| 232 |  | SF3A1_HUMAN | 29 | 88970  |      |       |   | Splicing factor 3A subunit 1 OS=Homo sapiens GN=SF3A1 PE=1 SV=1                                            |
| 233 |  | RPN2_HUMAN  | 28 | 69241  |      |       |   | Dolichyl-diphosphooligosaccharide--protein glycosyltransferase subunit 2 OS=Homo sapiens GN=RPN2 PE=1 SV=3 |
| 234 |  | OTOF_HUMAN  | 28 | 227096 |      |       |   | Otoferlin OS=Homo sapiens GN=OTOF PE=1 SV=3                                                                |
| 235 |  | SF01_HUMAN  | 28 | 68286  |      |       |   | Splicing factor 1 OS=Homo sapiens GN=SF1 PE=1 SV=4                                                         |
| 236 |  | PMFBP_HUMAN | 28 | 119129 |      |       |   | Polyamine-modulated factor 1-binding protein 1 OS=Homo sapiens GN=PMFBP1 PE=2 SV=1                         |
| 237 |  | CELR1_HUMAN | 27 | 329278 | 1044 | 20.23 | 2 | Cadherin EGF LAG seven-pass G-type receptor 1 OS=Homo sapiens GN=CELSR1 PE=1 SV=1                          |
| 238 |  | DYH14_HUMAN | 27 | 400222 |      |       |   | Dynein heavy chain 14, axonemal OS=Homo sapiens GN=DNAH14 PE=2 SV=3                                        |
|     |  |             |    |        |      |       |   | 60S ribosomal protein L13a                                                                                 |

|     |             |    |        |                 |              |          |                                                                                                       |
|-----|-------------|----|--------|-----------------|--------------|----------|-------------------------------------------------------------------------------------------------------|
| 239 | RL13A_HUMAN | 27 | 23650  |                 |              |          | OS=Homo sapiens GN=RPL13A<br>PE=1 SV=2                                                                |
| 240 | ZN326_HUMAN | 26 | 65613  |                 |              |          | DBIRD complex subunit<br>ZNF326 OS=Homo sapiens<br>GN=ZNF326 PE=1 SV=2                                |
| 241 | TRI11_HUMAN | 26 | 52741  |                 |              |          | E3 ubiquitin-protein ligase<br>TRIM11 OS=Homo sapiens<br>GN=TRIM11 PE=1 SV=2                          |
| 242 | RL37A_HUMAN | 26 | 10296  |                 |              |          | 60S ribosomal protein L37a<br>OS=Homo sapiens GN=RPL37A<br>PE=1 SV=2                                  |
| 243 | RPKL1_HUMAN | 26 | 59999  | <b>1.466</b>    | <b>1.001</b> | <b>2</b> | Ribosomal protein S6 kinase-<br>like 1 OS=Homo sapiens<br>GN=RPS6KL1 PE=2 SV=1                        |
| 244 | RL35_HUMAN  | 26 | 14602  |                 |              |          | 60S ribosomal protein L35<br>OS=Homo sapiens GN=RPL35<br>PE=1 SV=2                                    |
| 245 | KDM8_HUMAN  | 25 | 47240  | 5.633e+4        | 4.532        | 2        | Lysine-specific demethylase 8<br>OS=Homo sapiens GN=KDM8<br>PE=1 SV=1                                 |
| 246 | TYW3_HUMAN  | 25 | 29775  | <b>2.443e+4</b> | <b>1.470</b> | <b>2</b> | tRNA wybutosine-synthesizing<br>protein 3 homolog OS=Homo<br>sapiens GN=TYW3 PE=2 SV=2                |
| 247 | WIPI2_HUMAN | 25 | 49377  |                 |              |          | WD repeat domain<br>phosphoinositide-interacting<br>protein 2 OS=Homo sapiens<br>GN=WIPI2 PE=1 SV=1   |
| 248 | PDE3A_HUMAN | 25 | 125160 |                 |              |          | cGMP-inhibited 3',5'-cyclic<br>phosphodiesterase A OS=Homo<br>sapiens GN=PDE3A PE=1<br>SV=3           |
| 249 | NOP2_HUMAN  | 25 | 89455  |                 |              |          | Putative ribosomal RNA<br>methyltransferase NOP2<br>OS=Homo sapiens GN=NOP2<br>PE=1 SV=2              |
| 250 | RL35A_HUMAN | 24 | 12582  |                 |              |          | 60S ribosomal protein L35a<br>OS=Homo sapiens GN=RPL35A<br>PE=1 SV=2                                  |
| 251 | CLO29_HUMAN | 24 | 37506  |                 |              |          | Uncharacterized protein<br>C12orf29 OS=Homo sapiens<br>GN=C12orf29 PE=1 SV=2                          |
| 252 | NNTM_HUMAN  | 24 | 113918 |                 |              |          | NAD(P) transhydrogenase,<br>mitochondrial OS=Homo<br>sapiens GN=NNT PE=1 SV=3                         |
| 253 | CPSF2_HUMAN | 24 | 88431  |                 |              |          | Cleavage and polyadenylation<br>specificity factor subunit 2<br>OS=Homo sapiens GN=CPSF2<br>PE=1 SV=2 |
| 254 | KV401_HUMAN | 23 | 13384  |                 |              |          | Ig kappa chain V-IV region<br>(Fragment) OS=Homo sapiens<br>GN=IGKV4-1 PE=4 SV=1                      |
| 255 | PRP19_HUMAN | 22 | 55146  |                 |              |          | Pre-mRNA-processing factor 19<br>OS=Homo sapiens GN=PRPF19<br>PE=1 SV=1                               |
| 256 | TBK1_HUMAN  | 22 | 83589  |                 |              |          | Serine/threonine-protein kinase<br>TBK1 OS=Homo sapiens<br>GN=TBK1 PE=1 SV=1                          |

|     |             |    |        |  |  |                                                                                                                                    |
|-----|-------------|----|--------|--|--|------------------------------------------------------------------------------------------------------------------------------------|
| 257 | CND3_HUMAN  | 22 | 114461 |  |  | Condensin complex subunit 3<br>OS=Homo sapiens GN=NCAPG<br>PE=1 SV=1                                                               |
| 258 | PLCL2_HUMAN | 22 | 125981 |  |  | Inactive phospholipase C-like<br>protein 2 OS=Homo sapiens<br>GN=PLCL2 PE=1 SV=2                                                   |
| 259 | RT24_HUMAN  | 21 | 19055  |  |  | 28S ribosomal protein S24,<br>mitochondrial OS=Homo<br>sapiens GN=MRPS24 PE=1<br>SV=1                                              |
| 260 | 2ABA_HUMAN  | 21 | 51771  |  |  | Serine/threonine-protein<br>phosphatase 2A 55 kDa<br>regulatory subunit B alpha<br>isoform OS=Homo sapiens<br>GN=PPP2R2A PE=1 SV=1 |
| 261 | RT31_HUMAN  | 21 | 45402  |  |  | 28S ribosomal protein S31,<br>mitochondrial OS=Homo<br>sapiens GN=MRPS31 PE=1<br>SV=3                                              |
| 262 | RS30_HUMAN  | 21 | 6672   |  |  | 40S ribosomal protein S30<br>OS=Homo sapiens GN=FAU<br>PE=1 SV=1                                                                   |
| 263 | TDRD7_HUMAN | 21 | 123658 |  |  | Tudor domain-containing<br>protein 7 OS=Homo sapiens<br>GN=TDRD7 PE=1 SV=2                                                         |
| 264 | DYH9_HUMAN  | 21 | 511551 |  |  | Dynein heavy chain 9,<br>axonemal OS=Homo sapiens<br>GN=DNAH9 PE=1 SV=3                                                            |
| 265 | FIGL1_HUMAN | 21 | 74154  |  |  | Fidgetin-like protein 1<br>OS=Homo sapiens GN=FIGNL1<br>PE=1 SV=2                                                                  |
| 266 | BRX1_HUMAN  | 21 | 41487  |  |  | Ribosome biogenesis protein<br>BRX1 homolog OS=Homo<br>sapiens GN=BRX1 PE=1 SV=2                                                   |
| 267 | MOV10_HUMAN | 21 | 113895 |  |  | Putative helicase MOV-10<br>OS=Homo sapiens GN=MOV10<br>PE=1 SV=2                                                                  |
| 268 | TCPH_HUMAN  | 20 | 59437  |  |  | T-complex protein 1 subunit eta<br>OS=Homo sapiens GN=CCT7<br>PE=1 SV=2                                                            |
| 269 | IDE_HUMAN   | 20 | 118077 |  |  | Insulin-degrading enzyme<br>OS=Homo sapiens GN=IDE<br>PE=1 SV=4                                                                    |
| 270 | SPTN5_HUMAN | 20 | 416579 |  |  | Spectrin beta chain, non-<br>erythrocytic 5 OS=Homo<br>sapiens GN=SPTBN5 PE=1<br>SV=1                                              |
| 271 | CENPP_HUMAN | 20 | 33224  |  |  | Centromere protein P<br>OS=Homo sapiens GN=CENPP<br>PE=1 SV=1                                                                      |
| 272 | GAR1_HUMAN  | 19 | 22434  |  |  | H/ACA ribonucleoprotein<br>complex subunit 1 OS=Homo<br>sapiens GN=GAR1 PE=1 SV=1                                                  |
| 273 | RL36_HUMAN  | 18 | 12310  |  |  | 60S ribosomal protein L36<br>OS=Homo sapiens GN=RPL36<br>PE=1 SV=3                                                                 |
|     |             |    |        |  |  | Signal-induced proliferation-<br>associated 1-like protein 1                                                                       |



|     |             |    |        |  |  |                                                                                                  |
|-----|-------------|----|--------|--|--|--------------------------------------------------------------------------------------------------|
| 292 | LRP2_HUMAN  | 15 | 521616 |  |  | receptor-related protein 2<br>OS=Homo sapiens GN=LRP2<br>PE=1 SV=3                               |
| 293 | VSIG4_HUMAN | 15 | 44015  |  |  | V-set and immunoglobulin<br>domain-containing protein 4<br>OS=Homo sapiens GN=VSIG4<br>PE=1 SV=1 |
| 294 | PCX1_HUMAN  | 14 | 259040 |  |  | Pecanex-like protein 1<br>OS=Homo sapiens GN=PCNX<br>PE=2 SV=2                                   |
| 295 | BDP1_HUMAN  | 14 | 294339 |  |  | Transcription factor TFIIIB<br>component B'' homolog<br>OS=Homo sapiens GN=BDP1<br>PE=1 SV=3     |
| 296 | NALP1_HUMAN | 13 | 165760 |  |  | NACHT, LRR and PYD domains-<br>containing protein 1 OS=Homo<br>sapiens GN=NLRP1 PE=1<br>SV=1     |
| 297 | PRIP1_HUMAN | 13 | 71970  |  |  | ProSAP-interacting protein 1<br>OS=Homo sapiens<br>GN=PROSAPIP1 PE=2 SV=1                        |
| 298 | M3K9_HUMAN  | 13 | 122126 |  |  | Mitogen-activated protein<br>kinase kinase kinase 9<br>OS=Homo sapiens GN=MAP3K9<br>PE=1 SV=3    |
